1 **Title**

2 Characterization of a Novel Plasmid in *Serratia marcescens* Harboring *bla*<sub>GES-5</sub> Isolated from  
3 a Nosocomial Outbreak in Japan

4 **Running title**

5 Plasmid in *S. marcescens* Confers Carbapenem Resistance

6 Noriko Nakanishi,<sup>a\*</sup> Shoko Komatsu,<sup>a</sup> Tomotada Iwamoto,<sup>a</sup> Ryohei Nomoto<sup>a\*#</sup>

7 <sup>a</sup>Department of Infectious Diseases, Kobe Institute of Health, 4-6-5 Minatojima-nakamachi,  
8 Chuo-ku, Kobe, Hyogo, 650-0046, Japan.

9 <sup>#</sup>Corresponding author:

---

\* *Noriko Nakanishi and Ryohei Nomoto contributed equally to this work. Author order was determined alphabetically.*

10 R. Nomoto, Ph.D, E-mail: [ryohei\\_nomoto@office.city.kobe.lg.jp](mailto:ryohei_nomoto@office.city.kobe.lg.jp)

11 Department of Infectious Diseases, Kobe Institute of Health, Kobe, Japan, 4-6-5

12 Minatojima-nakamachi, Chuo-ku, Kobe, Hyogo, 650-0046, Japan.

13 Tel: +81-78-302-6251, Fax: +81-78-302-6402

14

15 **Abstract**

16 *Serratia marcescens* is a nosocomial pathogen with carbapenem resistance, limiting the  
17 availability of effective treatment options. In this study, we performed molecular  
18 characterization of GES-5 carbapenemase-producing *S. marcescens* isolated from an  
19 outbreak in Japan. Comparative genetic analysis revealed that the *bla*<sub>GES-5</sub>-encoding plasmid  
20 p2020-O-9 is a unique plasmid contributing towards carbapenem resistance. Furthermore,  
21 this study highlights the necessity of surveillance programs for monitoring novel, along with  
22 commonly occurring carbapenemases in clinical settings.

23

24

25

26 **KEYWORDS:** *Serratia marcescens*, carbapenemase, *bla*<sub>GES-5</sub>, whole-genome sequencing

27 **Abbreviations:** WGS: whole-genome sequencing

28     *Serratia marcescens* is a major opportunistic pathogen known to cause nosocomial  
29     infections associated with high morbidity and mortality (1, 2). As this bacterium shows  
30     resistance towards widely used carbapenem class of antibiotics, treatment options available  
31     for nosocomial infections becomes limited (3-5). Carbapenemases (a class of  $\beta$ -lactamases)  
32     identified in Japan comprise KPC, GES, NDM, IMP, VIM, and OXA-48 variants, with IMP  
33     being the most prevalent in the country (6). GES type Amber class A  $\beta$ -lactamases, in  
34     addition to exhibiting  $\beta$ -lactam resistance, also confer carbapenemase activity, such as the  
35     GES-5 variant (7, 8). In recent times, nosocomial outbreaks have largely been attributed to  
36     GES-5 carbapenemase-producing bacterial strains in various countries including Japan,  
37     wherein the first outbreak of *P. aeruginosa* harboring the *bla*<sub>GES-5</sub> gene occurred in the year  
38     2014 (9-13). This study reports the genetic characteristics of a different GES-5 producing

39 bacterium, *S. marcescens* isolated from an ICU outbreak in Japan in 2020.

40

41 A total of six carbapenem-resistant *S. marcescens* strains were isolated from the  
42 samples from three ICU patients collected during May-October 2020 (Table 1). Strain was  
43 identified using MALDI Biotyper (Bruker Daltonics K.K., Yokohama, Japan), and the  
44 minimal inhibitory concentrations (MICs) of various antimicrobial agents were determined  
45 by E-test (bioMérieux Japan Ltd., Tokyo, Japan) following the manufacturer's guidelines. As  
46 indicated in Table 1, all of the six *S. marcescens* strains were resistant to imipenem,  
47 meropenem, and ceftazidime. Modified carbapenem inactivation method (mCIM) indicated  
48 the absence of carbapenemase genes in all the strains. This was supported by the negative  
49 results of PCR screening conducted for the major carbapenemase genes *bla*<sub>IMP</sub>, *bla*<sub>NDM</sub>,  
50 *bla*<sub>KPC</sub>, and *bla*<sub>OXA-48-like</sub>; however, a positive result was obtained for *bla*<sub>GES</sub>. The MICs of  
51 antimicrobial agents (except ampicillin (AM) and cefotaxime (CTX)) in 2020-O-14-2 strain  
52 lacking the *bla*<sub>GES-5</sub> gene, isolated from patient B, were significantly lower than all the other

53 isolates. Whole-genome sequencing of the six isolates harboring *bla*<sub>GES-5</sub> gene and the one  
54 lacking the gene was done for analyzing single nucleotide variations and deriving genetic  
55 relationships among the seven isolates to understand the mechanisms of antimicrobial  
56 resistance. A survey for analyzing environmental contamination in the ICU was conducted  
57 during the outbreak period; however, the presence of carbapenem-resistant *S.*  
58 *marcescens* strains was not detected.

59 Genomic libraries of all seven isolates were prepared using the Nextera XT DNA library  
60 prep kit (Illumina, San Diego, CA, USA) and sequenced on the iSeq 100 system (Illumina).  
61 Additionally, Oxford Nanopore Technologies (ONT) were used for constructing a  
62 sequencing library of the strain 2020-O-9 with the help of Rapid Barcoding Kit  
63 (SQK-RBK004), and sequenced on a MinION device using flow cell type R9.4.1  
64 (FLO-MIN106D). Hybrid assembly of 2020-O-9 genome was performed using Unicycler

65 v0.4.8 (14), and a circular chromosome and plasmid (p2020-O-9) sequence was obtained.

66 The genome sequences were annotated using DFAST (<https://dfast.nig.ac.jp/>) and are

67 available in DDBJ (DNA Data Bank of Japan) under the accession numbers AP024847

68 (chromosome) and AP024848 (plasmid). SNP analysis of the remaining 6 strains was

69 performed taking the genome sequence of 2020-O-9 as a reference, using bwa version 0.7.17,

70 samtools version 1.9, and VarScan v2.4.4 (15-17). The analysis revealed high degree of

71 genetic homogeneity with 0 to 5 SNPs consistent among the seven strains isolated, including

72 GES-5 negative strain 2020-O-14-2. The whole-genome sequencing reads are available in

73 DDBJ Sequence Read Archive under the accession number listed in Table 1. Since MICs of

74 carbapenems in 2020-O-14-2 strain lacking the *bla*<sub>GES-5</sub> gene were significantly decreased, it

75 is evident that the newly detected *bla*<sub>GES-5</sub> containing plasmid contributes to carbapenem

76 resistance.

77 Further genetic characterization of p2020-O-9 was done using ResFinder 3.2 to identify

78 resistance genes, and plasmid incompatibility replicon typing was performed using

79 PlasmidFinder 2.0 developed by the Center for Genomic Epidemiology

80 (<http://www.genomicepidemiology.org/>). The chromosomal sequence of 2020-O-9

81 consisted of a single antimicrobial resistance gene *bla*<sub>SRT-2</sub>, as identified by existing

82 databases. p2020-O-9 is a novel 23,921-bp circular untypeable plasmid, with the *bla*<sub>GES-5</sub>

83 gene located between *intI1* of class 1 integron and the *qacEΔ1* and *sulI*, together with a gene

84 of GNAT-family N-acetyltransferase, *aac(6)-29a*. It has a GC-content of 61% and carries 26

85 protein-coding genes (Fig.1). Sequence analysis using NCBI revealed that the plasmid

86 backbone of p2020-O-9 showed highest similarity with plasmid pCAV1374-16 from



87 *Klebsiella oxytoca* with a query coverage of 59%; however, there was no *bla*<sub>GES-5</sub> in  
88 pCAV1374-16 (Accession no. CP011628). The class 1 integron cassette around the *bla*<sub>GES-5</sub>  
89 gene in p2020-O-9 is similar to that of pMRY16-414SMA\_2 from *S. marcescens* (Accession  
90 no. LC486677) and the plasmid from *Aeromonas hydrophila* strain WCHAH 01-derived  
91 plasmids pGES5 (Accession no. KR014105) (Fig. 1). Plasmid sequences similar to the  
92 backbone of p2020-O-9 such as pCAV1374-16, have been registered in databases from a  
93 wide range of bacterial species. It is believed that *bla*<sub>GES-5</sub> was integrated into the class 1  
94 integron cassette of a plasmid like pCAV1374-16 to construct the novel p2020-O-9 plasmid.  
95 This suggests that p2020-O-9 could be an untypeable plasmid with the potential to distribute  
96 itself widely in *Enterobacteriaceae*.

97 In summary, we reported the molecular characterization of GES-5 producing *S.*  
98 *marcescens* strain harboring a novel *bla*<sub>GES-5</sub> gene-encoding plasmid, p2020-O-9 isolated  
99 from the ICU outbreak in Japan. The prevalence and transmission of GES-producing bacteria  
100 is largely underestimated due to their rare presence in clinical isolates. However, through this  
101 study, we highlight the necessity of surveillance programs for monitoring novel, as well as  
102 commonly occurring carbapenemases in clinical settings.

103

#### 104 **Data availability**

105 Sequence data that support the findings of this study have been deposited in DDBJ  
106 (<https://www.ddbj.nig.ac.jp/>) with the accession numbers AP024847 and AP024848.

107

108 **Author contributions**

109 NN, RN designed the study methods and wrote the first draft of the manuscript. NN, RN,

110 SK collected the data. NN, RN analyzed the data. TI contributed to the writing of the

111 manuscript.

112

113 **Ethical approval**

114 This study was approved by the Ethical Review Committee of the Kobe Institute of Health

115 (approval No. SenR3-9).

116

117 **Acknowledgments**

118 We are grateful to Dr. Mari Matsui and Dr. Satowa Suzuki at the National Institute of  
119 Infectious Diseases, Japan, for their guidance. This work was partially supported by a  
120 grant-in-aid from the Japan Agency for Medical Research and Development (AMED)  
121 Research Program on Emerging and Re-emerging Infectious Diseases (grant no.  
122 JP21fk0108103).

123 We declare no conflicts of interest.

124

## 125 **References**

- 126 1. **Iosifidis E, Farmaki E, Nedelkopoulou N, Tsivitanidou M, Kaperoni M, Pentsoglou**  
127 **V, Pournaras S, Athanasiou-Metaxa M, Roilides E.** 2012. Outbreak of bloodstream  
128 infections because of *Serratia marcescens* in a pediatric department. *Am J Infect Control*

- 129        **40**:11–15. doi: [10.1016/j.ajic.2011.03.020](https://doi.org/10.1016/j.ajic.2011.03.020).
- 130    2. **Gastmeier P.** 2014. *Serratia marcescens*: an outbreak experience. Front Microbiol.
- 131        2014 **5**:81. doi: [10.3389/fmicb.2014.00081](https://doi.org/10.3389/fmicb.2014.00081).
- 132    3. **Moradigaravand D, Boinett CJ, Martin V, Peacock SJ, Parkhill J.** 2016. Recent
- 133        independent emergence of multiple multidrug-resistant *Serratia marcescens* clones
- 134        within the United Kingdom and Ireland. Genome Res. **26**:1101–1109.
- 135    4. **Silva KE, Cayô R, Carvalhaes CG, Patussi Correia Sacchi F, Rodrigues-Costa F,**
- 136        **Ramos da Silva AC, Croda J, Gales AC, Simionatto S.** 2015. Coproduction of KPC-2
- 137        and IMP-10 in carbapenem-resistant *Serratia marcescens* isolates from an outbreak in a
- 138        Brazilian teaching hospital. J Clin Microbiol **53**:2324–2328. doi:
- 139        [10.1128/JCM.00727-15](https://doi.org/10.1128/JCM.00727-15).

- 140 5. **Nastro M, Monge R, Zintgraff J, Vaulet LG, Boutureira M, Famiglietti A,**  
141 **Rodriguez CH.** 2013. First nosocomial outbreak of VIM-16-producing *Serratia*  
142 *marcescens* in Argentina. *Clin Microbiol Infect.: the Official Publication of the*  
143 *European Society of Clinical Microbiology and Infectious Diseases* **19**:617–619. doi:  
144 [10.1111/j.1469-0691.2012.03978.x](https://doi.org/10.1111/j.1469-0691.2012.03978.x).
- 145 6. **Logan LK, Weinstein RA.** 2017. The epidemiology of carbapenem-resistant  
146 *Enterobacteriaceae*: the impact and evolution of a global menace. *J Infect Dis.* **215**:S28–  
147 S36. doi: [10.1093/infdis/jiw282](https://doi.org/10.1093/infdis/jiw282).
- 148 7. **Bontron S, Poirel L, Nordmann P.** 2015. In vitro prediction of the evolution of GES-1  
149  $\beta$ -lactamase hydrolytic activity. *Antimicrob. Agents Chemother.* **59**:1664–1670.
- 150 8. **Walther-Rasmussen J, Høiby N.** 2007. Class A carbapenemases. *J Antimicrob*

- 151 Chemother **60**:470–482.
- 152 9. **Ellington MJ, Davies F, Jauneikaite E, Hopkins KL, Turton JF, Adams G, Pavlu J,**
- 153 **Innes AJ, Eades C, Brannigan ET, Findlay J, White L, Bolt F, Kadhani T, Chow Y,**
- 154 **Patel B, Mookerjee S, Otter JA, Sriskandan S, Woodford N, Holmes A.** 2020. A
- 155 multispecies cluster of GES-5 carbapenemase-producing Enterobacterales linked by a
- 156 geographically disseminated plasmid. Clin Infect Dis.: an Official Publication of the
- 157 Infectious Diseases Society of America **71**:2553–2560. doi: [10.1093/cid/ciz1130](https://doi.org/10.1093/cid/ciz1130).
- 158 10. **Chudejova K, Rotova V, Skalova A, Medvecky M, Adamkova V, Papagiannitsis**
- 159 **CC, Hrabak J.** 2018. Emergence of sequence type 252 Enterobacter cloacae producing
- 160 GES-5 carbapenemase in a Czech hospital. Diagn Microbiol Infect Dis **90**:148–150.
- 161 11. **Hishinuma T, Tada T, Kuwahara-Arai K, Yamamoto N, Shimojima M, Kirikae T.**

- 162 2018. Spread of GES-5 carbapenemase-producing *Pseudomonas aeruginosa* clinical  
163 isolates in Japan due to clonal expansion of ST235. *PLoS One* **13**:e0207134.
- 164 12. **Literacka E, Izdebski R, Urbanowicz P, Żabicka D, Klepacka J, Sowa-Sierant I,**  
165 **Żak I, Garus-Jakubowska A, Hryniewicz W, Gniadkowski M.** 2020. Spread of  
166 *Klebsiella pneumoniae* ST45 Producing GES-5 carbapenemase or GES-1  
167 Extended-Spectrum  $\beta$ -lactamase in Newborns and Infants. *Antimicrob Agents*  
168 *Chemother* 64:64(9):e00595-20. doi: [10.1128/AAC.00595-20](https://doi.org/10.1128/AAC.00595-20).
- 169 13. **Kanayama A, Kawahara R, Yamagishi T, Goto K, Kobaru Y, Takano M,**  
170 **Morisada K, Ukimura A, Kawanishi F, Tabuchi A, Matsui T, Oishi K.** 2016.  
171 Successful control of an outbreak of GES-5 extended-spectrum  $\beta$ -lactamase-producing  
172 *Pseudomonas aeruginosa* in a long-term care facility in Japan. *J Hosp Infect.* **93**:35–41.



- 173 14. **Wick RR, Judd LM, Gorrie CL, Holt KE.** 2017. Unicycler: resolving bacterial  
174 genome assemblies from short and long sequencing reads. PLoS Comput Biol  
175 **13:e1005595.**
- 176 15. **Li H.** Aligning sequence reads, clone sequences and assembly contigs with  
177 BWA-MEM. [arXiv:1303.3997v2](https://arxiv.org/abs/1303.3997v2) [q-bio.GN]. 2013.
- 178 16. **Danecek P, Bonfield JK, Liddle J, Marshall J, Ohan V, Pollard MO, Whitwham**  
179 **A, Keane T, McCarthy SA, Davies RM, Li H.** 2021. Twelve years of SAMtools and  
180 BCFtools. GigaScience **10.** <https://doi.org/10.1093/gigascience/giab008>.
- 181 17. **Koboldt DC, Zhang Q, Larson DE, Shen D, McLellan MD, Lin L, Miller CA,**  
182 **Mardis ER, Ding L, Wilson RK.** 2012. VarScan 2: Somatic mutation and copy  
183 number alteration discovery in cancer by exome sequencing. Genome Research

184 22:568–576. DOI: [10.1101/gr.129684.111](https://doi.org/10.1101/gr.129684.111).

185 18. **Alikhan NF, Petty NK, Ben Zakour NL, Beatson SA.** 2011. BLAST Ring Image

186 Generator (BRIG): simple prokaryote genome comparisons. *BMC Genomics* **12**:402.

187 PMID: [21824423](https://pubmed.ncbi.nlm.nih.gov/21824423/).

188 **Figure legends**

189 **Figure 1.**

190 Circular representation of p2020-O-9 was generated using BLAST Ring Image Generator

191 0.95 (18). A comparison of the plasmid with pMRY16-414SMA\_2 from *Serratia marcescens*

192 MRY-414SMA (LC486677), pGES5 from *Aeromonas hydrophila* WCHAH 01

193 (KR014105), and pCAV1374-16 from *Klebsiella oxytoca* (CP011628). The outermost circle

194 indicates the coding sequence of p2020-O-9. Red, carbapenemase genes; blue, other

195 antimicrobial resistance genes; purple, IS6100; orange, transposase, and recombinase genes;

196 green, integrase genes; grey, other genes or coding sequences.

197

TABLE 1. Information and the antibiotic susceptibility of the *Serratia marcescens* isolated from three patients involved in the ICU outbreaks

| Patients | Age (yr),<br>sex <sup>a</sup> | No. of isolate | Date of isolation<br>(year/month/day) | Specimens | MICs (µg/ml) for <sup>b</sup> |     |     |     |     |     |     |     |     |      |      |      |       | <i>bla</i> <sub>GES-5</sub> | DDBJ accession no.<br>of read data |           |
|----------|-------------------------------|----------------|---------------------------------------|-----------|-------------------------------|-----|-----|-----|-----|-----|-----|-----|-----|------|------|------|-------|-----------------------------|------------------------------------|-----------|
|          |                               |                |                                       |           | AM                            | CTX | CAZ | FEP | ATM | IMP | MPM | DOR | ETP | AK   | MC   | CIP  | PMB   |                             |                                    |           |
| A        | 76, F                         | 2020-O-9       | 2020/5/25                             | Sputum    | >256                          | >32 | >32 | 6   | 6   | >32 | >32 | >32 | >32 | >32  | >256 | 4    | 0.5   | >1024                       | +                                  | DRR308222 |
|          |                               | 2020-O-12      | 2020/6/23                             | Blood     | >256                          | >32 | >32 | 3   | 4   | >32 | >32 | >32 | >32 | >32  | >256 | 3    | 1     | >1024                       | +                                  | DRR308223 |
|          |                               | 2020-O-21-2    | 2020/8/3                              | Sputum    | >256                          | >32 | >32 | 2   | 3   | 6   | >32 | >32 | >32 | 8    | 64   | 3    | 1.5   | 64                          | +                                  | DRR308224 |
|          |                               | 2020-O-21-3    | 2020/8/4                              | Blood     | >256                          | >32 | >32 | 2   | 8   | >32 | >32 | >32 | 24  | >32  | 96   | 3    | 1.5   | 128                         | +                                  | DRR308225 |
| B        | 70, M                         | 2020-O-14-1    | 2020/6/19                             | Blood     | >256                          | >32 | >32 | 4   | 6   | >32 | >32 | >32 | >32 | 128  | 12   | >32  | 96    | +                           | DRR308226                          |           |
|          |                               | 2020-O-14-2    |                                       |           | >256                          | >32 | 2   | 3   | 4   | 1   | 1.5 | 1.5 | 4   | 16   | 3    | 3    | 64    | -                           | DRR308227                          |           |
| C        | 59, M                         | 2020-O-25      | 2020/10/15                            | Ascites   | >256                          | >32 | >32 | 3   | 8   | >32 | >32 | >32 | >32 | >256 | 3    | 0.38 | >1024 | +                           | DRR308228                          |           |

<sup>a</sup> F, female, M, male.

<sup>b</sup> ampicillin (AM), cefotaxime (CTX), ceftazidime (CAZ), cefepime (FEP), aztreonam (ATM), imipenem (IMP), meropenem (MPM), doripenem (DOR), ertapenem (ETP), amikacin (AK), minocycline (MC), ciprofloxacin (CIP), polymyxin B (PMB)

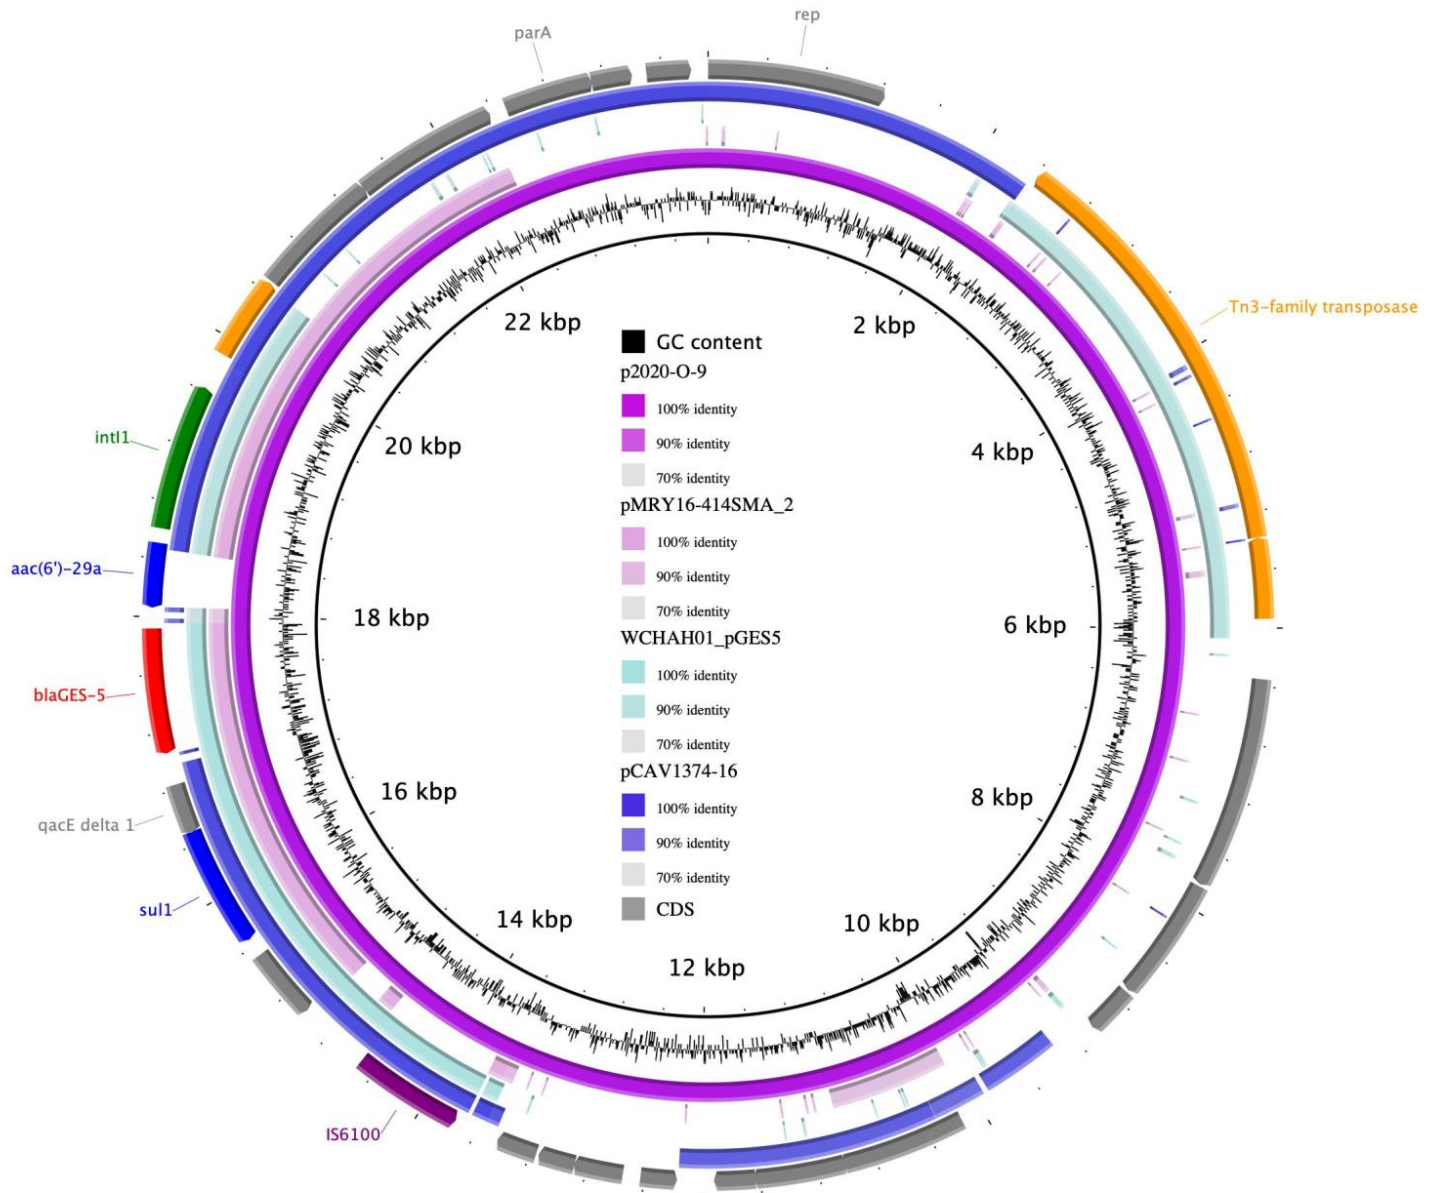

Figure 1. Circular representation of p2020-O-9 was generated using BLAST Ring Image Generator 0.95 (18). A comparison with the pMRY16-414SMA\_2 from *Serratia marcescens* MRY-414SMA (LC486677), pGES5 from *Aeromonas hydrophila* WCHAH 01 (KR014105), and pCAV1374-16 from *Klebsiella oxytoca* (CP011628). The outermost circle shows the coding sequence of p2020-O-9. Red, carbapenemase genes; blue, other antimicrobial resistance genes; purple, IS6100; orange, transposase and recombinase genes; green, integrase genes; grey, other genes or coding sequences.
